# Supplementary material for: TiO2 supported cobalt oxide for olefin epoxidation reaction – characterization, catalytic activities and mechanism – using a DFT model
Source: Royal Society of Chemistry journal article supplement (doi:10.1039/d2dt01118b), 2022-01-01
Supplement: d2dt01118b1.pdf [file d2dt01118b1.pdf]

## Supporting Materials

### **TiO<sub>2</sub> supported Cobalt Oxide for Olefin Epoxidation Reaction – Characterization, Catalytic Activities and Mechanism – Using DFT Model**

Subhashree Mishra <sup>a</sup> Simon Watre Sangma<sup>a</sup>, Mukesh kumar Poddar <sup>b</sup>, Rajaram Bal <sup>\*,b,c</sup>

G. P. Singh<sup>d</sup> and Ratan Kumar Dey <sup>\*a</sup>

<sup>a</sup> Department of Chemistry, Central University of Jharkhand (CUJ), Ranchi – 835 205, India

<sup>b</sup> Light and Stock Processing Division, CSIR-Indian Institute of Petroleum (IIP),  
Dehradun-248005, India

<sup>c</sup> Academy of Scientific and Innovative Research (AcSIR), Ghaziabad-201002, India.

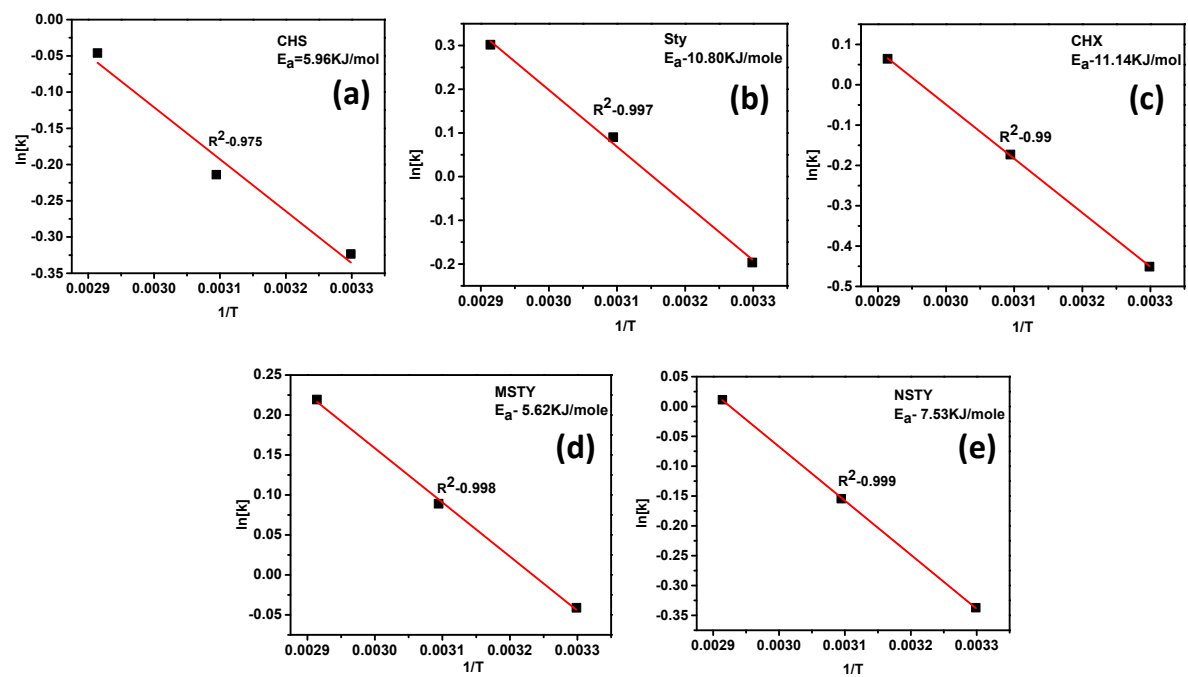

**Fig. S1.** Activation energy of (a) Chloro Styrene (b) Styrene (c) Cyclohexene (d) Methyl Styrene (e) Nitro Styrene.

**Table S1.** activation energy and rate constant.

| <b>Substrate</b> | <b>Rate constant</b> | <b>Activation energy</b> |
|------------------|----------------------|--------------------------|
| Styrene          | -0.82128             | 10.80KJ/mole             |
| Chlorostyrene    | -0.80738             | 5.96KJ/mol               |
| Nitrostyrene     | -0.85684             | 7.53KJ/mole              |
| methylstyrene    | -1.09303             | 5.62KJ/mole              |
| Cyclohexene      | -0.84094             | 11.14KJ/mol              |

## DFT Supporting Data

Table S2

| Molecule                      | Vacuum ( $E_h$ ) | Solvent ( $E_h$ ) | Solvation Energy kcal/mol |
|-------------------------------|------------------|-------------------|---------------------------|
| H <sub>2</sub> O <sub>2</sub> | -151.5468424     | -151.5583898      | -7.246034417              |
| H <sub>2</sub> O              | -76.42256054     | -76.43325217      | -6.7090299                |
| O                             | -74.96488477     | -74.96728249      | -1.504576093              |
| OH·                           | -75.74348112     | -75.75046408      | -4.381828349              |
| OOH·                          | -150.9198393     | -150.9286625      | -5.536640945              |
| H·                            | -0.498764285     | -0.49888577       | -0.076232562              |

| Reaction                                             | $\Delta G$ (kcal/mol) |
|------------------------------------------------------|-----------------------|
| H <sub>2</sub> O <sub>2</sub> → H <sub>2</sub> O + O | 99.05454969           |
| H <sub>2</sub> O <sub>2</sub> → 2OH·                 | 36.05732638           |
| H <sub>2</sub> O <sub>2</sub> → H· + OOH·            | 82.10340219           |

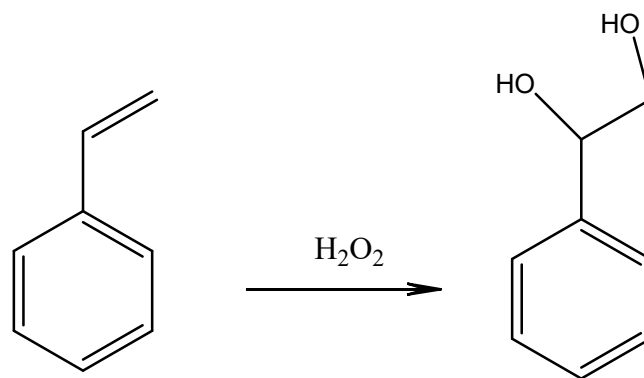

**Reaction Scheme 1 (Intermediate 1)**

Table S3

| Vacuum ( $E_h$ ) |                               |              | Solvent ( $E_h$ ) |                               |              | $\Delta G$ (kcal/mol) |
|------------------|-------------------------------|--------------|-------------------|-------------------------------|--------------|-----------------------|
| Styrene          | H <sub>2</sub> O <sub>2</sub> | Int 1        | Styrene           | H <sub>2</sub> O <sub>2</sub> | Int 1        |                       |
| -309.4581374     | -151.5468424                  | -461.0879714 | -309.4628591      | -151.5583898                  | -461.1038436 | -51.83                |

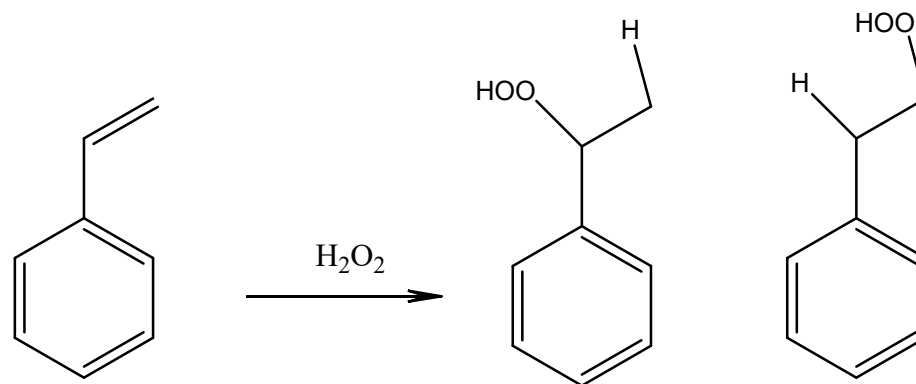

Reaction Scheme 2 (Intermediate 2A or 2B)

**Table S4**

| <b>Vacuum (E<sub>h</sub>)</b> |                                   |               | <b>Solvent (E<sub>h</sub>)</b> |                                   |               | <b>ΔG (kcal/mol)</b> |
|-------------------------------|-----------------------------------|---------------|--------------------------------|-----------------------------------|---------------|----------------------|
| <b>Styrene</b>                | <b>H<sub>2</sub>O<sub>2</sub></b> | <b>Int 2A</b> | <b>Styrene</b>                 | <b>H<sub>2</sub>O<sub>2</sub></b> | <b>Int 2A</b> |                      |
| -309.4581374                  | -151.5468424                      | -461.0042952  | -309.4628591                   | -151.5583898                      | -461.0172822  | 2.48                 |

| <b>Vacuum (E<sub>h</sub>)</b> |                                   |               | <b>Solvent (E<sub>h</sub>)</b> |                                   |               | <b>ΔG (kcal/mol)</b> |
|-------------------------------|-----------------------------------|---------------|--------------------------------|-----------------------------------|---------------|----------------------|
| <b>Styrene</b>                | <b>H<sub>2</sub>O<sub>2</sub></b> | <b>Int 2B</b> | <b>Styrene</b>                 | <b>H<sub>2</sub>O<sub>2</sub></b> | <b>Int 2B</b> |                      |
| -309.4581374                  | -151.5468424                      | -461.0028449  | -309.4628591                   | -151.5583898                      | -461.0155513  | 3.57                 |

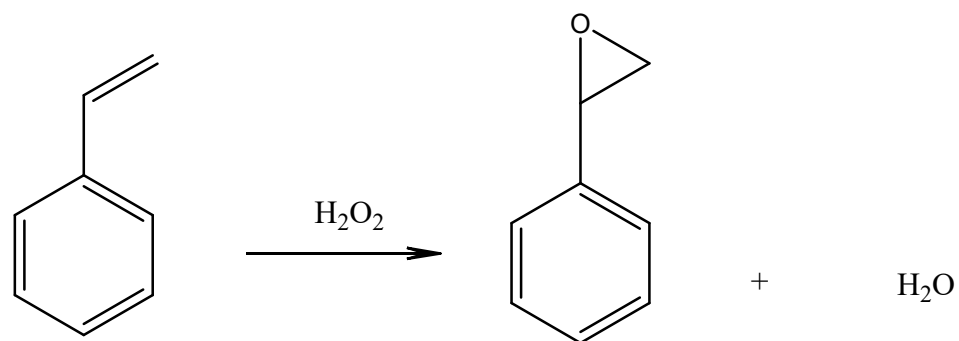

**Reaction Scheme 3**

**Table S5**

| Molecule      | Vacuum (E <sub>h</sub> ) |                               |              |                  | Solvent (E <sub>h</sub> ) |                               |              |                  |
|---------------|--------------------------|-------------------------------|--------------|------------------|---------------------------|-------------------------------|--------------|------------------|
|               | Styrene                  | H <sub>2</sub> O <sub>2</sub> | Oxide        | H <sub>2</sub> O | Styrene                   | H <sub>2</sub> O <sub>2</sub> | Oxide        | H <sub>2</sub> O |
| Styrene       | -309.4581374             | -151.5468424                  | -384.6521644 | -76.42256126     | -309.4628591              | -151.5583898                  | -384.6601795 | 76.43325676      |
| Chlorostyrene | -769.033453              | -151.5468424                  | -844.227141  | -76.42256126     | -769.038951               | -151.5583898                  | -844.2356754 | 76.43325676      |
| Methylstyrene | -348.7358112             | -151.5468424                  | -423.9296224 | -76.42256126     | -348.741395               | -151.5583898                  | -423.9383657 | 76.43325676      |
| Nitrostyrene  | -513.9660216             | -151.5468424                  | -589.1591697 | -76.42256126     | -513.9773834              | -151.5583898                  | -589.173286  | 76.43325676      |
| Cyclohexene   | -234.4518534             | -151.5468424                  | -309.650181  | -76.42256126     | -234.4542727              | -151.5583898                  | -309.6564001 | 76.43325676      |



| Molecule      | $\Delta G$ kcal/mol |
|---------------|---------------------|
| Styrene       | -45.29              |
| Chlorostyrene | -44.92              |
| Methylstyrene | -45.08              |
| Nitrostyrene  | -44.41              |
| Cyclohexene   | -48.31              |

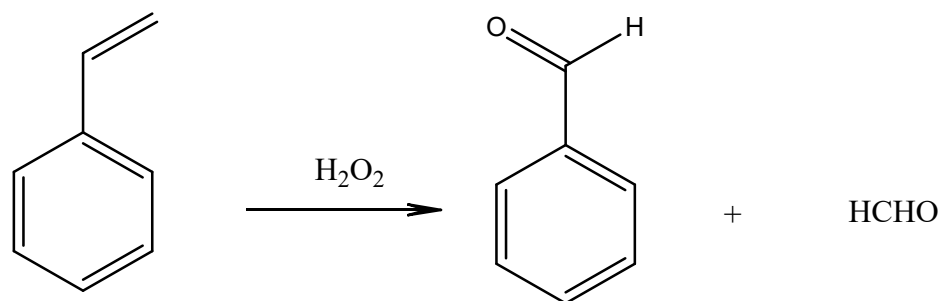

**Table S6**

| <b>Molecule</b> | <b>Vacuum (E<sub>h</sub>)</b> |                                   |                 |                     | <b>Solvent (E<sub>h</sub>)</b> |                                   |                 |                     | <b>ΔG<br/>kcal/mol</b> |
|-----------------|-------------------------------|-----------------------------------|-----------------|---------------------|--------------------------------|-----------------------------------|-----------------|---------------------|------------------------|
|                 | <b>Styrene</b>                | <b>H<sub>2</sub>O<sub>2</sub></b> | <b>Aldehyde</b> | <b>Formaldehyde</b> | <b>Styrene</b>                 | <b>H<sub>2</sub>O<sub>2</sub></b> | <b>Aldehyde</b> | <b>Formaldehyde</b> |                        |
| Styrene         | -309.458137                   | -151.54684                        | -345.422430     | -114.4895901        | -309.46285                     | -151.55838                        | -345.432138     | -114.4959154        | 686.98                 |
| Chlorostyrene   | -769.033453                   | -151.54684                        | -804.997263     | -114.4895901        | -769.03895                     | -151.55838                        | -805.007117     | -114.4959154        | 687.68                 |
| Methylstyrene   | -348.735811                   | -151.54684                        | -384.700208     | -114.4895901        | -348.74139                     | -151.55838                        | -384.711674     | -114.4959154        | 685.35                 |
| Nitrostyrene    | -513.966021                   | -151.54684                        | -549.926250     | -114.4895901        | -513.97738                     | -151.55838                        | -549.941277     | -114.4959154        | 689.36                 |

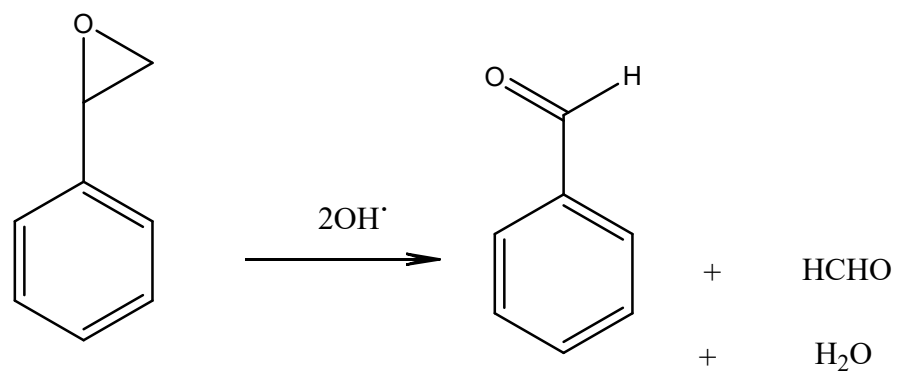

**Styrene oxide to Benzaldehyde**

**Table S7**

| Vacuum ( $E_h$ )  |              |              |              |                  |
|-------------------|--------------|--------------|--------------|------------------|
| Oxide             | OH $\cdot$   | Aldehyde     | HCHO         | H <sub>2</sub> O |
| -384.6521644      | -75.74348112 | -345.4224303 | -114.4895901 | -76.42256054     |
| Solvent ( $E_h$ ) |              |              |              |                  |
| Oxide             | OH $\cdot$   | Aldehyde     | HCHO         | H <sub>2</sub> O |
| -384.6601795      | -75.75046408 | -345.4321381 | -114.4959154 | -76.43325217     |

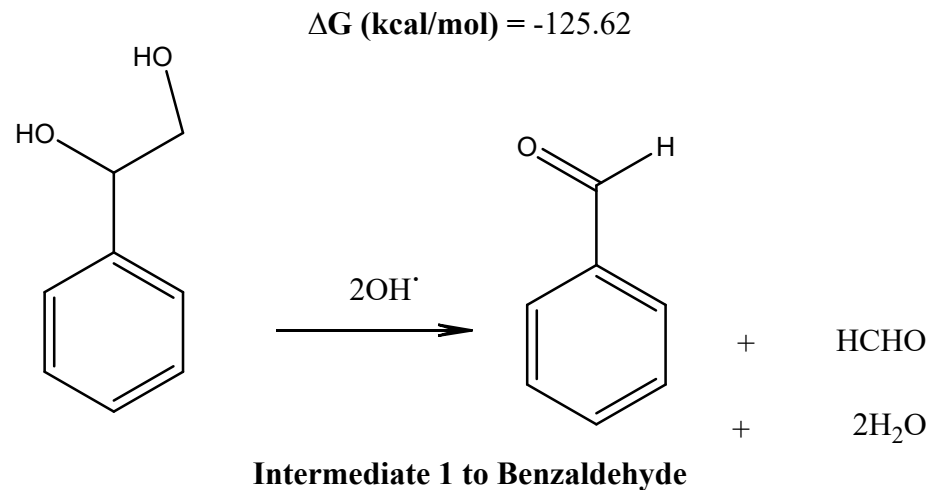

**Table S8**

| <b>Vacuum (<math>E_h</math>)</b>  |              |                     |              |                       |
|-----------------------------------|--------------|---------------------|--------------|-----------------------|
| <b>Int 1</b>                      | <b>OH·</b>   | <b>Benzaldehyde</b> | <b>HCHO</b>  | <b>H<sub>2</sub>O</b> |
| -461.0879714                      | -75.74348112 | -345.4224303        | -114.4895901 | -76.42256054          |
| <b>Solvent (<math>E_h</math>)</b> |              |                     |              |                       |
| <b>Int 1</b>                      | <b>OH·</b>   | <b>Benzaldehyde</b> | <b>HCHO</b>  | <b>H<sub>2</sub>O</b> |
| -461.1038436                      | -75.75046408 | -345.4321381        | -114.4959154 | -76.43325217          |

$\Delta G$  (kcal/mol) = -119.09

**Table S9. Comparative aspect of HOMO and LUMO energies**

| <b>Molecule</b> | <b>HOMO<br/>Orbital energy (eV)</b>                                                           | <b>LUMO<br/>Orbital energy (eV)</b>                                                             | <b>HOMO-LUMO<br/>gap (eV)</b> |
|-----------------|-----------------------------------------------------------------------------------------------|-------------------------------------------------------------------------------------------------|-------------------------------|
| Styrene         | 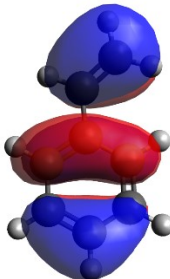<br>-6.3222 | <br>-1.2282 | 5.094                         |

|               |                                                                                                                               |                                                                                                                                   |        |
|---------------|-------------------------------------------------------------------------------------------------------------------------------|-----------------------------------------------------------------------------------------------------------------------------------|--------|
| Chlorostyrene | 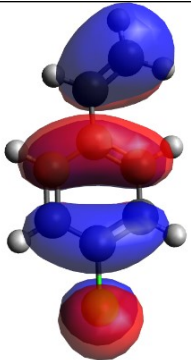 <p data-bbox="800 553 905 586">-6.3013</p>  |  <p data-bbox="1167 570 1272 602">-1.3686</p>  | 4.9327 |
| Methylstyrene |  <p data-bbox="800 971 905 1003">-6.1244</p> |  <p data-bbox="1167 976 1272 1008">-1.1257</p> | 4.9987 |
| Nitrostyrene  |                                            |                                              |        |

|                               |                                                                                   |                                                                                      |         |
|-------------------------------|-----------------------------------------------------------------------------------|--------------------------------------------------------------------------------------|---------|
|                               | -6.7953                                                                           | -2.8828                                                                              | 3.9125  |
| Cyclohexene                   | 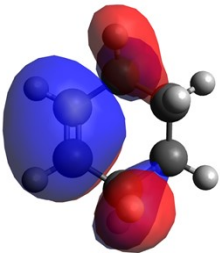 |   |         |
|                               | -6.5629                                                                           | 0.4937                                                                               | 7.0566  |
| H <sub>2</sub> O <sub>2</sub> |  |   |         |
|                               | -8.1644                                                                           | 0.1942                                                                               | 8.3586  |
| OH <sup>-</sup>               |  |  |         |
|                               | -9.4555                                                                           | 1.3251                                                                               | 10.7806 |

**Table S10. Comparison table**

| Sl. No. | Reactant(s) | Catalyst                                  | Time (hr) | Temperature (°C) | Molar ratio of Oxidant Sty:oxidant | Conversion (%) | Selectivity (%) | Reference |
|---------|-------------|-------------------------------------------|-----------|------------------|------------------------------------|----------------|-----------------|-----------|
| 1)      | Styrene     | MOF                                       | 24        | 100              | 2mM TBHP                           | 99             | 70              | (1)       |
| 2)      | Styrene     | Au-Ag nanocluster                         | 24        | 65               | 1.5mM TBHP                         | 78.9           | 63.9            | (2)       |
| 3)      | Styrene     | Gold nanoparticles supported on dendrimer | 24        | 80               |                                    | 95             | 50              | (3)       |
| 4)      | Styrene     | CoFe <sub>2</sub> O <sub>4</sub>          | 5         | 80               | 1:2 Sty:TBHP                       | 81.8           | 76.2            | (4)       |
| 5)      | Styrene     | Cerium                                    | 9         | 70               | 2:3                                | 59.4           | 10.2            | (5)       |



|           |                 |                                   |          |           |                                                     |             |             |                     |
|-----------|-----------------|-----------------------------------|----------|-----------|-----------------------------------------------------|-------------|-------------|---------------------|
|           |                 | doped Cobalt ferrite              |          |           | Sty:H <sub>2</sub> O <sub>2</sub>                   |             |             |                     |
| 6)        | Styrene         | Co-Al <sub>2</sub> O <sub>3</sub> |          | 90        |                                                     | 75.8        | 56.6        | (6)                 |
| 7)        | Styrene         | NiCo <sub>2</sub> O <sub>4</sub>  | 10       | 70        | 1:3<br>Sty:H <sub>2</sub> O <sub>2</sub>            | 78          | 67          | (7)                 |
| <b>8)</b> | <b>Our work</b> | <b>TiCo(NP)<sup>HT</sup></b>      | <b>6</b> | <b>50</b> | <b>1:2</b><br><b>Sty:H<sub>2</sub>O<sub>2</sub></b> | <b>88.3</b> | <b>85.1</b> | <b>Present work</b> |

## References:

- (1) J. Hui, H. Chu, W. Zhang, Y. Shen, W. Chen, Y. Hu, W. Liu, C. Gao, S. Guo, G. Xiao, S. Li, Y. Fu, D. Fan, W. Zhang, and F. Huo, *Nanoscale*, 2018, **10**, 8772 – 8778.
- (2) J. Chai, H. Chong, S. Wang, S. Yang, M. Wu, and M. Zhu, *RSC Adv.*, 2016, 6, 111399 – 111405.
- (3) A. S. Sharma, D. Shah and H. Kaur, *RSC Adv.*, 2015, 5, 42935 – 42941.
- (4) J. Liua, R. Meng, J. Li, P. Jian, L. Wang, and R. Jian, *Appl. Catalysis B.*, 2019, 254, 214 – 222.
- (5) J. Tong, W. Li, L. Bo, H. Wang, Y. Hu, Z. Zhang, and A. Mahboob, *J. Catalysis*, 2016, 344, 474 – 481.
- (6) D. Pan, Q. Xu, Z. Dong, S. Chen, F. Yu, X. Yan, B. Fan and R. Li, *RSC Adv.*, 2015, 5, 98377 – 98390.
- (7) B. Paul, S. K. Sharma, R. Khatun, S. Adak, G. Singh, V. Joshi, M. K. Poddar, A. Bordoloi, T. Sasaki, and R. Bal, *Ind. Eng. Chem. Res.* 2019, 58, 18168–18177.
